# Supplementary material for: Immunophenotyping of an Unusual Mixed-Type Extraskeletal Osteosarcoma in a Dog
Source: MDPI journal article supplement (doi:10.3390/vetsci8120307), 2021-12-06
Supplement: s1 [file s1]

**Supplementary Table S1.** Detailed immunohistochemistry methods.

| <b>Protein</b>  | <b>Company<br/>(Cat #, Clone)</b>                   | <b>Antigen retrieval</b>       | <b>Antibody<br/>dilution</b> |
|-----------------|-----------------------------------------------------|--------------------------------|------------------------------|
| Vimentin        | Dako<br>(M0725, V9)                                 | HIER<br>(Sodium citrate)       | 1:100                        |
| Pan-cytokeratin | Abcam<br>(ab86734, AE1/AE3 and 5D3)                 | HIER<br>(Sodium citrate)       | 1:100                        |
| S100            | Dako<br>(IS504, polyclonal)                         | HIER<br>(Tris/EDTA)            | 1:100                        |
| Collagen 2      | Merk Millipore<br>(AB746P, polyclonal)              | PIER<br>(Pepsin)               | 1:500                        |
| Sox9            | Abcam<br>(ab26414, polyclonal)                      | HIER<br>(Tris/EDTA)            | 1:200                        |
| Ezrin           | Invitrogen<br>(MA5-13862, 3C12)                     | HIER<br>(Sodium citrate)       | 1:250                        |
| CD34            | Abcam<br>(ab81289, EP373Y)                          | HIER<br>(Tris/EDTA)            | 1:1000                       |
| IGF2            | Santa Cruz biotechnology<br>(sc-5622, H-103)        | HIER<br>(Tris/EDTA)            | 1:200                        |
| Ki-67           | Abcam<br>(ab15580, polyclonal)                      | HIER<br>(Sodium citrate)       | 1:500                        |
| Runx2           | Abcam<br>(ab23981, polyclonal)                      | HIER<br>(Sodium citrate)       | 1:200                        |
| VEGF            | Santa Cruz biotechnology<br>(sc-80439, VE01C)       | HIER<br>(Sodium citrate)       | 1:250                        |
| Cox-2           | Santa Cruz biotechnology<br>(sc-1747-R, polyclonal) | HIER<br>(Sodium citrate)       | 1:50                         |
| FGF-2           | Santa Cruz biotechnology<br>(sc-79, polyclonal)     | HIER<br>(Sodium citrate)       | 1:500                        |
| CRLR            | Novusbio<br>(NLS6731, polyclonal)                   | HIER<br>(Sodium citrate)       | 1:100                        |
| $\alpha$ -SMA   | Sigma-Aldrich<br>(CBL171, 1A4)                      | Without antigen retrieval step | 1:500                        |
| RANKL           | Santa Cruz biotechnology<br>(sc-7628, polyclonal)   | PIER<br>(Proteinase K)         | 1:250                        |

HIER, heat-induced epitope retrieval; PIER, proteolytic-induced epitope retrieval.

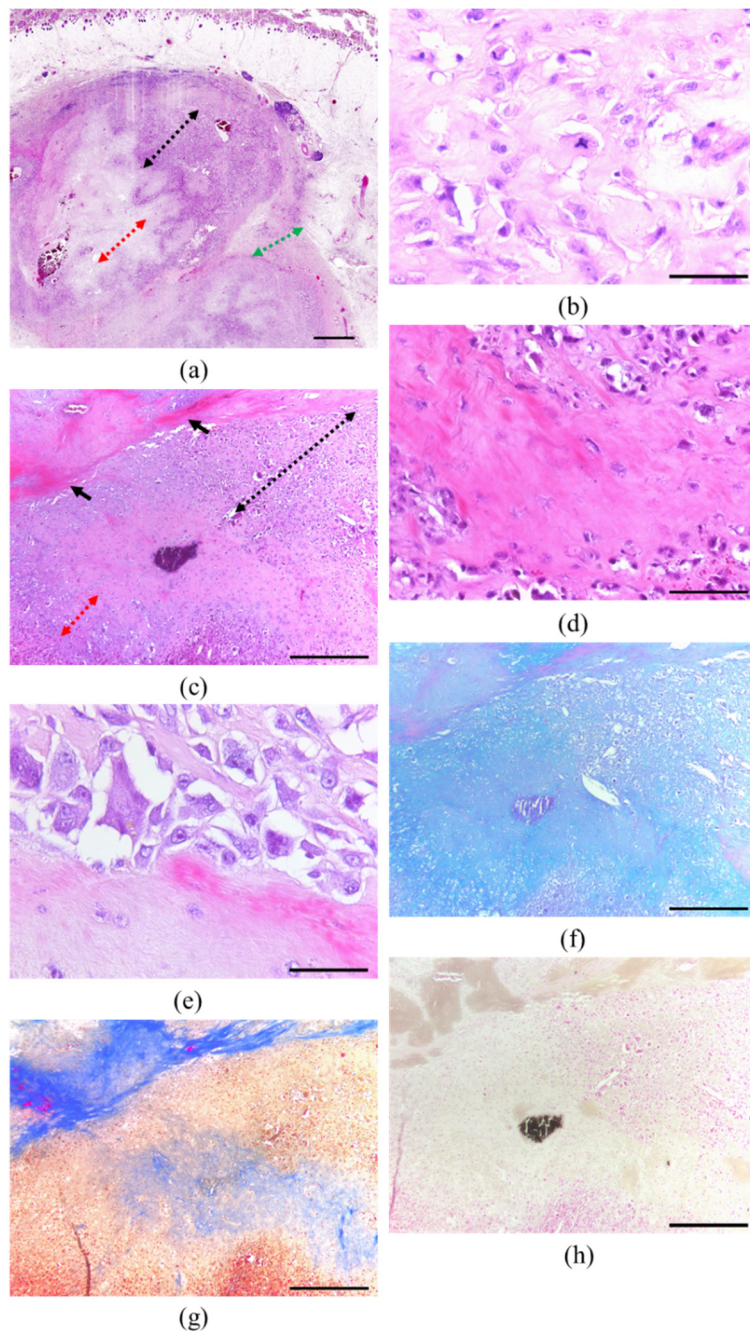

**Supplementary Figure S1.** Histopathology of the extraskeletal osteosarcoma. **(a)** The tumor was located on the subcutaneous adipose tissue surrounded by thick fibrous tissue (green dashed arrows). It was irregularly lobulated and composed of two distinct areas: hypercellular (black dashed arrows) and hypocellular (red dashed arrows) lesions; **(b)** Tripolar mitosis within the pleomorphic mesenchymal cells; **(c)** Highly eosinophilic, osteoid matrix (black arrow) is found along with giant cells (black dashed arrows) and chondrocytes (red dashed arrows); **(d)** Microscopic appearance of osteoid matrix; **(e)** Osteoblast-like cells along with osteoid matrix; **(f)** Chondroid tissue shows positive blue color via PAS-Alcian blue staining; **(g)** Osteoid matrix exhibits patchy red/blue color via Masson's trichrome staining; **(h)** Few mineralized foci in the osteoid are shown as black colored-calcium deposition in Von Kossa staining. Scale bar = 2 mm **(a)**, 50  $\mu$ m **(b,e)**, 500  $\mu$ m **(c, f-h)**, and 100  $\mu$ m **(d)**.

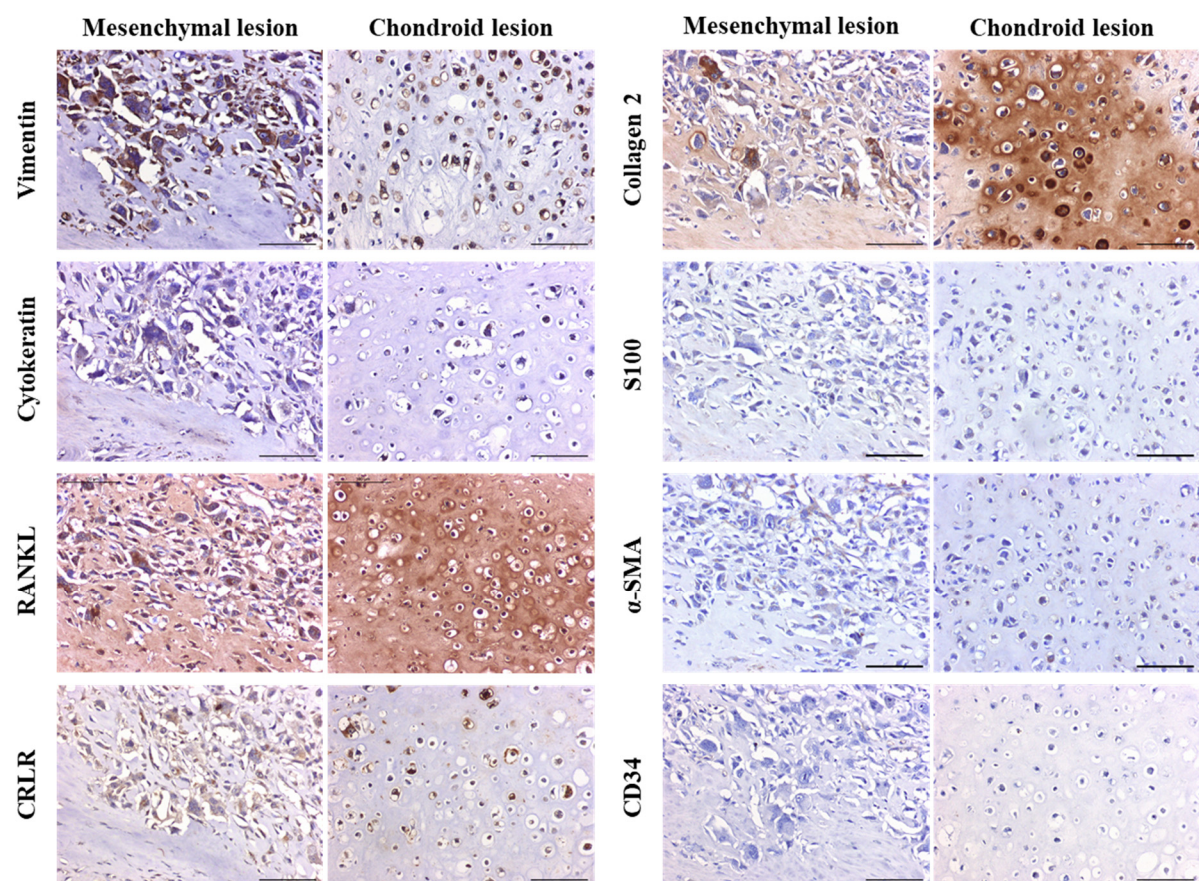

**Supplementary Figure S2.** Immunohistochemistry panel to elucidate the tumor's nature. The serially obtained tissue sections were labeled with diagnostic markers. The immunoreaction score is listed in Table 1. Scale bar = 100  $\mu$ m.



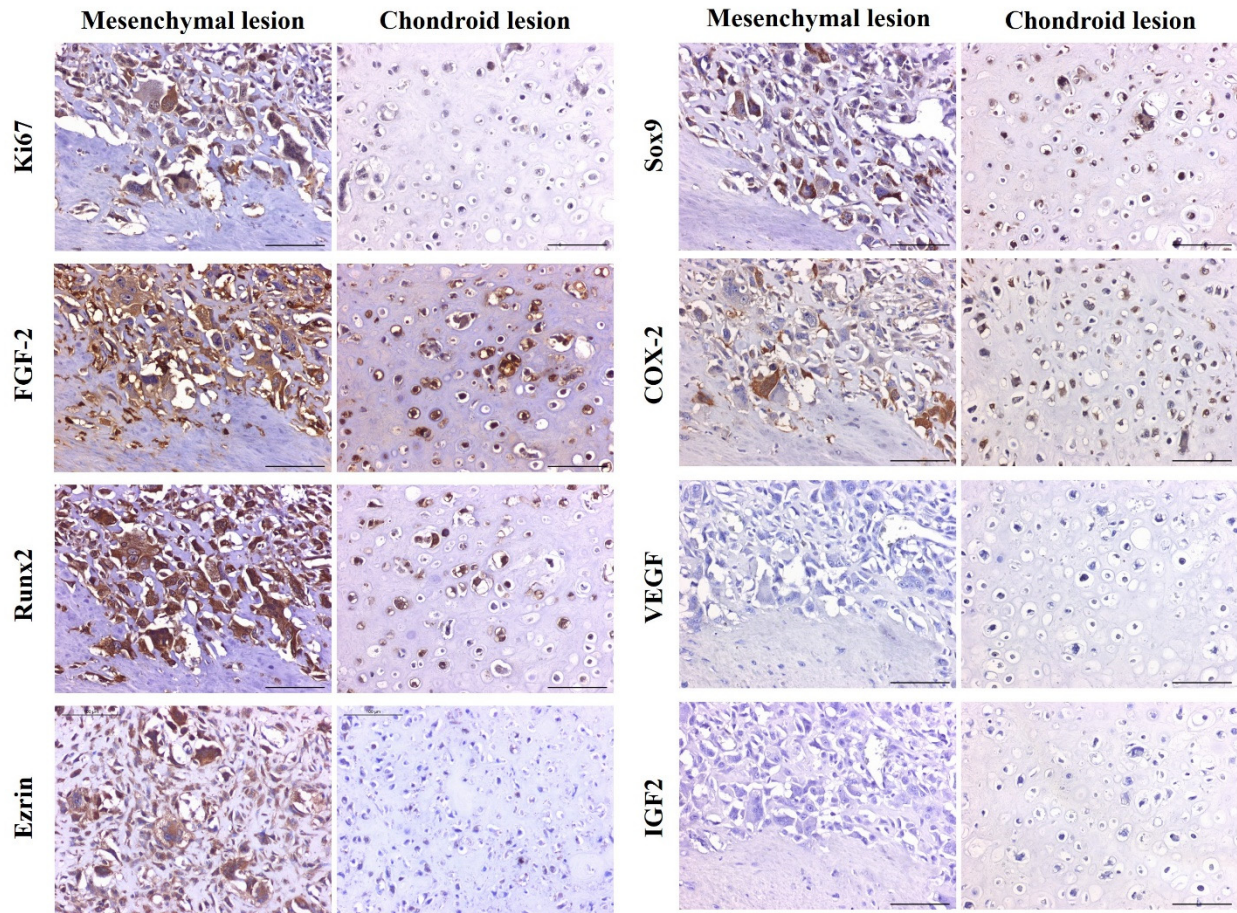

**Supplementary Figure S2 (cont.).** The serially obtained tissue sections were labeled with prognostic markers. Scale bar = 100  $\mu$ m.
